# Supplementary material
Source: PubMed Central journal article supplement (PMC5869011)
Supplement: develop-145-161075-s1.pdf [file develop-145-161075-s1.pdf]

**A**

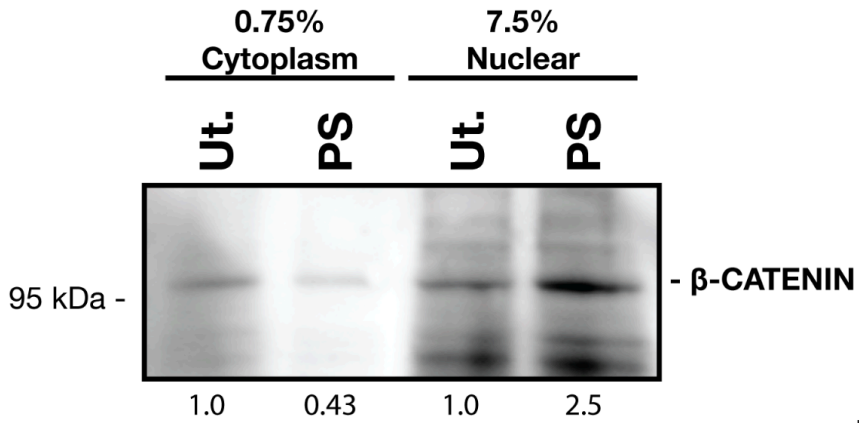

**B**

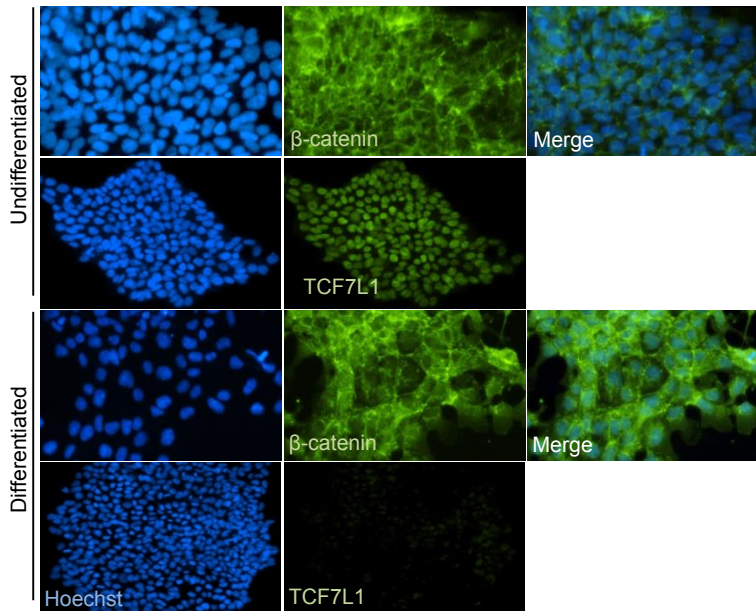

**C**

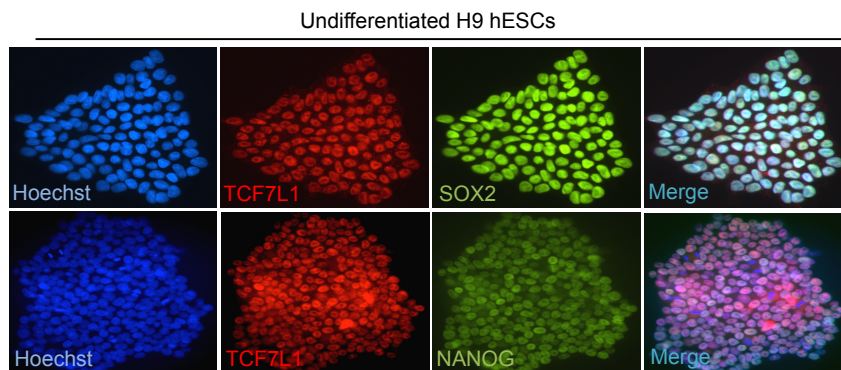

**Supplemental Figure 1. Analysis of TCF7L1, SOX2, NANOG and  $\beta$ -CATENIN expression in human embryonic stem cells (hESCs).**

A. Immunoblot analysis of  $\beta$ -CATENIN in cytoplasm and nuclear extracts.

Nuclear/cytoplasmic fractionation analysis of  $\beta$ -CATENIN distribution after 48 hrs of PS differentiation. Equal lysate percentages were loaded for each fraction and the band intensities were quantitated relative to the untreated  $\beta$ -CATENIN band for each condition. N=1.

B. Immunofluorescence analyses of the active form of  $\beta$ -CATENIN using a non-

phosphorylated anti- $\beta$ -CATENIN antibody and an anti-TCF7L1 antibody in

undifferentiated and differentiated hESCs. Cells ( $1 \times 10^5$ /well) were grown on a 12-well

multiwall glass bottom plate (MatTek) coated with Matrigel and cultured in mTeSR plus

ROCKi to increase single cell survival. Cells were cultured in mTeSR for another 24 hrs

before treatment with 50 ng/mL BMP4 and ACTIVIN A in E5/E6 basal medium for 48

hrs. Undifferentiated H9 cells showed membrane bound  $\beta$ -CATENIN and expression of

TCF7L1, while differentiated cells showed an increase of the active form of  $\beta$ -CATENIN

and a loss of TCF7L1 in the nucleus (stained with Hoechst dye). N=1.

C. Immunofluorescence analyses of NANOG, SOX2, and TCF7L1 in undifferentiated

hESCs. Cells were cultured at a 1:24 ratio on 35 mm dish coated with Matrigel for 48 h

in TeSR E8 medium. Note the co-expression of NANOG and TCF7L1, as well as SOX2

and TCF7L1 in the nuclei (Hoechst) of hESCs. N=1.

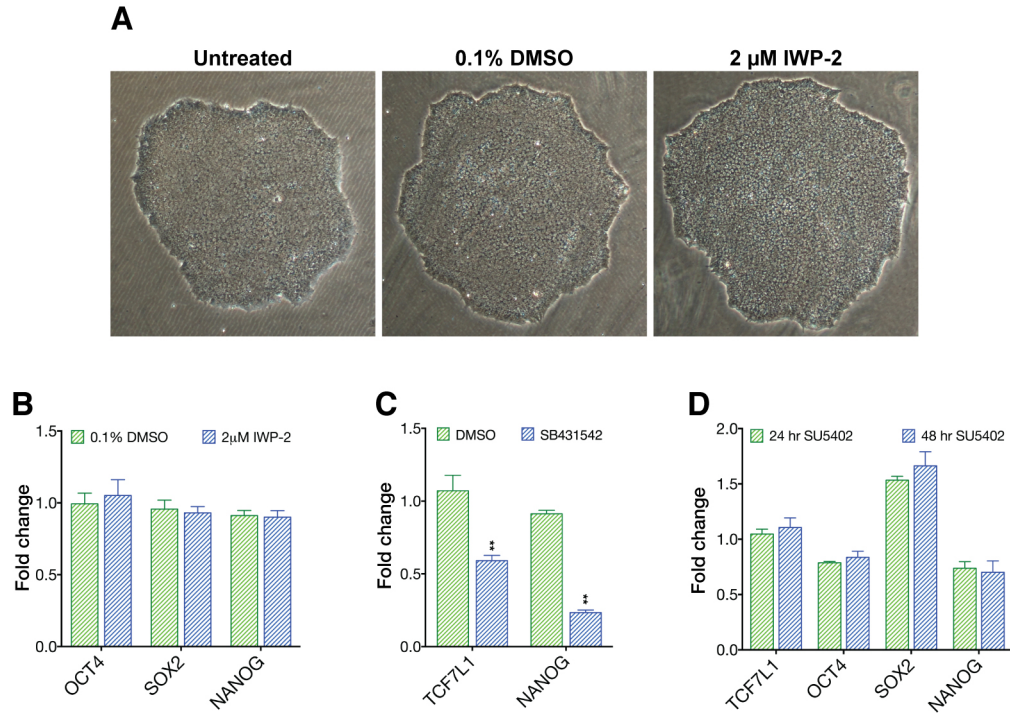

### Supplemental Figure 2. Effects of Signaling Pathway Manipulation on *TCF7L1* Expression.

- A. Phase contrast images (10X) after 7 days of inhibition of WNT signaling with IWP-2 treatment under feeder-free conditions. In all three conditions hESCs were morphologically indistinguishable from each other.
- B. qPCR analysis of pluripotent marker genes - *OCT4*, *SOX2* and *NANOG* - was performed 7 days after treating hESCs, under feeder-free conditions, with IWP-2 (2  $\mu$ M) (n=3). Treatment had no effect as compared to DMSO vehicle control.
- C. *TCF7L1* and *NANOG* mRNA expression were down-regulated following 24 h treatment with the ALK5 inhibitor SB431542 (10  $\mu$ M) under feeder-free conditions (n=3 two-tailed *t*-test \*\* $P \leq 0.01$ ).
- D. *TCF7L1*, *OCT4*, *SOX2* and *NANOG* mRNA expression were assayed by qPCR following 24 and 48 hrs of treatment with the FGFR inhibitor SU5402 (10  $\mu$ M) under feeder-free conditions (n=3). There was a slight down-regulation of *OCT4* and *NANOG*, no effect on *TCF7L1* and slight up-regulation of *SOX2*.

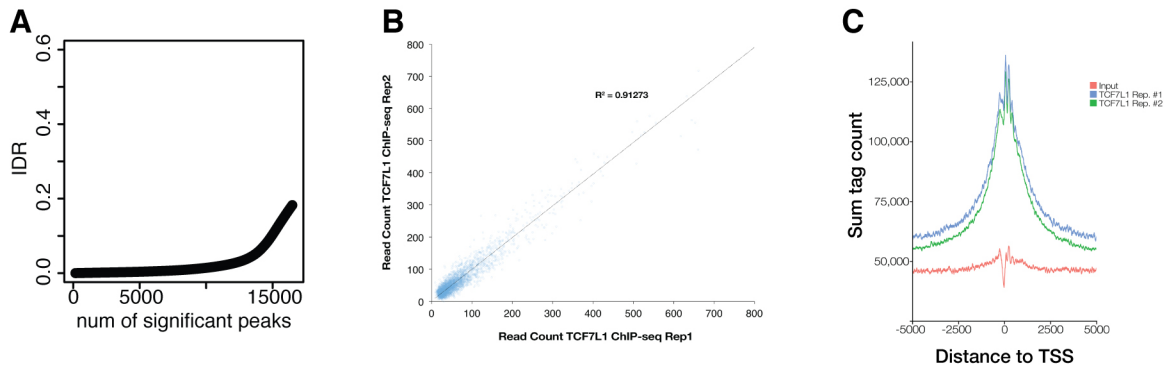

### Supplemental Figure 3. Analysis of TCF7L1 ChIP-seq Replicates.

- A. Irreproducibility discovery rate (IDR) plot showing a high degree of reproducibility in the two ChIP-seq biological replicates. The IDR is plotted as an increasing number of reproducible ChIP-seq peaks are found. IDR analysis reveals the appropriate cutoff for the number of ChIP-seq peaks to be included in all subsequent analyses. An IDR cutoff of 0.013249 (top 9760) were used for the analysis, which is well within the range suggested by ENCODE.
- B. Scatter plot illustrating the high degree of reproducibility of the two TCF7L1 ChIP-seq replicates. The number of reads that mapped to the top 3518 peaks (IDR <0.002406) were determined for each TCF7L1 ChIP-seq biological replicate. The replicate with a greater number of mapped reads was scaled to the replicate with less mapped reads.
- C. coverageBed (Quinlan & Hall, 2010) was used to determine the number of reads that map to each base-pair position +/-5 kb of the TSS of all human hg19 RefSeq genes. The number of mapped reads used for this analysis was the same for each sample (approximately 54 million). R was used to calculate and plot the mean tag count at each position, which represents the total number of reads mapped to each base divided by the number of RefSeq genes.

Job ID: 20171012-public-3.0.0-WISjp5

Display name: EstarasBcatWNT3a.TCF3.overlap.outer (1).bed

## GO Biological Process

-log<sub>10</sub>(Binomial p value)

0 50 100 150 200 250 300

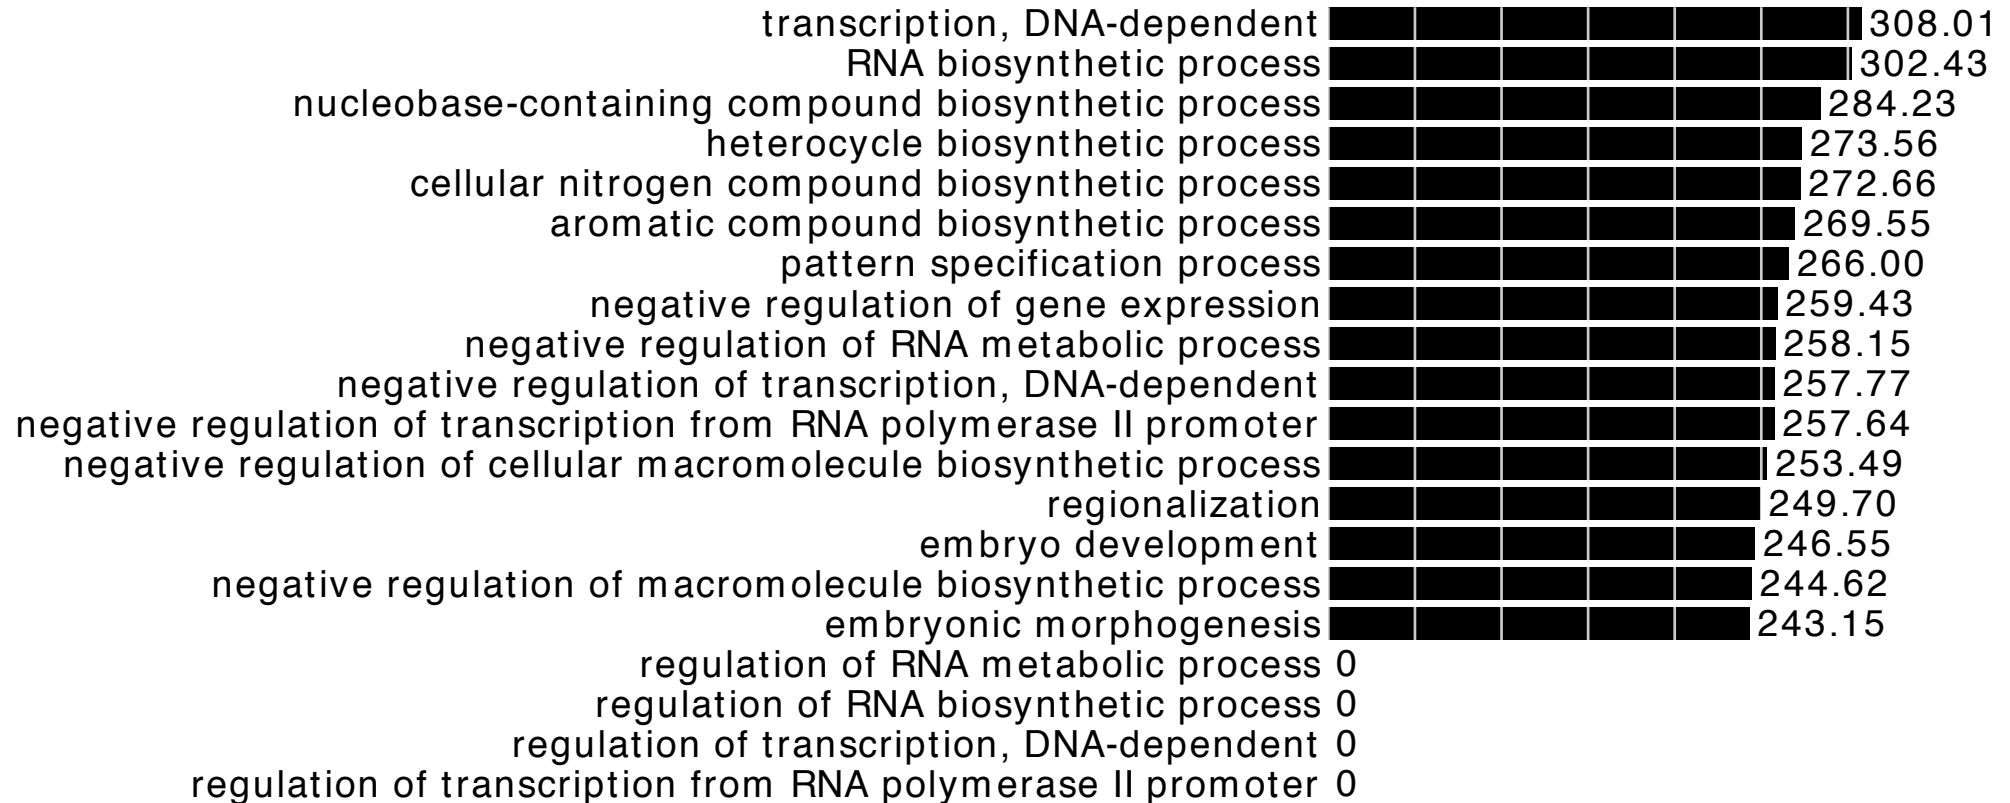

**Supplemental Figure 4. Analysis of non-overlapping TCF7L1 peaks with  $\beta$ -Catenin after 4 hours of WNT treatment.**

GO analysis showing biological processes of the TCF7L1 peaks not overlapping with  $\beta$ -CATENIN. The most prominent categories were: transcription, DNA-dependent RNA biosynthetic process nucleobase-containing compound biosynthetic process and heterocycle biosynthetic process. Regionalization, embryo development, negative regulation of macromolecule biosynthetic process, embryonic morphogenesis were represented in these non-overlapping peaks but with a lower degree of confidence.

**A**

Comparing number of genes that are common between the different TFs

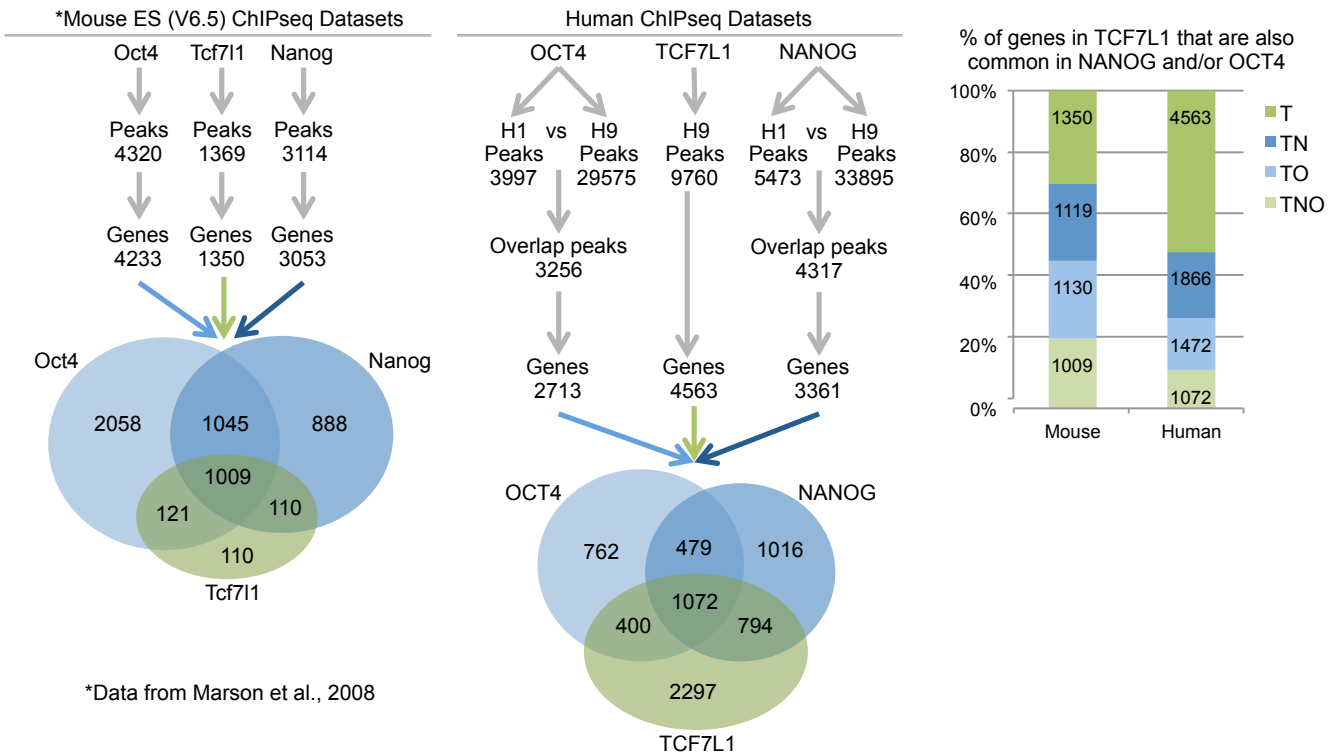

**B**

Comparing number of overlapping peaks

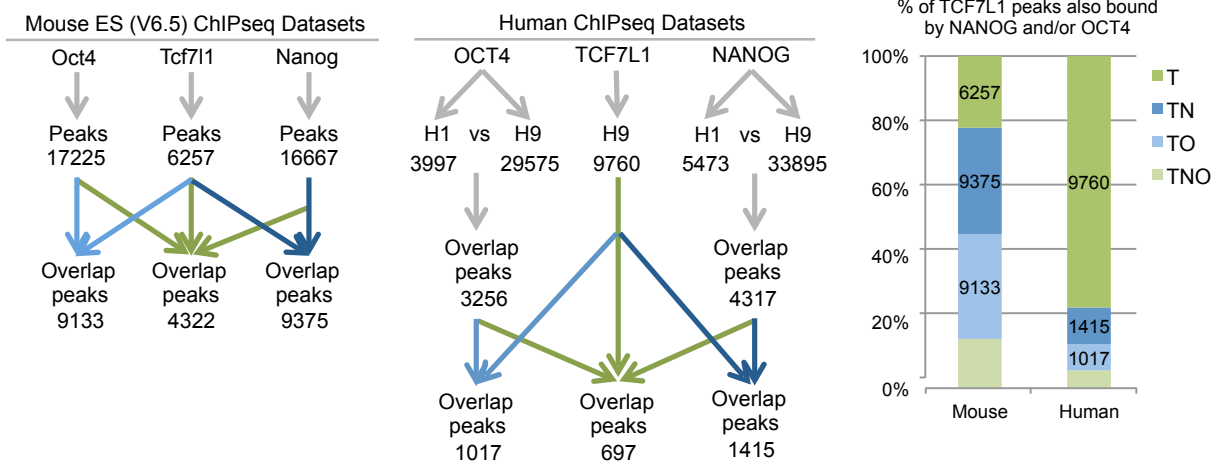

**Supplemental Figure 5. Analyses of TCF7L1 overlap with OCT4 (POU5F1) and NANOG in mouse and human ESCs.**

- A. Flow diagram of the analyses of mouse (LEFT) and human (CENTER) ESCs ChIPseq datasets to determine common genes that are regulated by OCT4, NANOG, and TCF7L1. Annotation for neighboring genes near (+/- 5-8 kb) peaks or overlapping peaks and compared those genes that are associated with OCT4, NANOG, and TCF7L1 in a venn diagram. Table S2 from Marson et al supplemental data was used for the mouse analysis (Marson et al., 2008). Mouse genes are from RefSeq while human genes are from Ensembl (ENSG ID) genes. (FAR RIGHT) Stock graph showing the percentage of genes in N – NANOG and/or O – OCT4 that are also common in T – TCF7L1.
- B. Flow diagram of the analyses of mouse (LEFT) and human (CENTER) ESCs ChIPseq datasets to determine overlapping peaks that are enrich for OCT4, NANOG, and TCF7L1. Identification of total overlapping peaks for TN, TO, and TNO in human ESCs were determined using ChIPpeakAnno. Table S3 from Marson et al supplemental data was used for the mouse analysis (Marson et al., 2008). (FAR RIGHT) Stock graph showing the percentage of overlapping peaks between TN, TO, and TNO over the total TCF7L1 peaks.



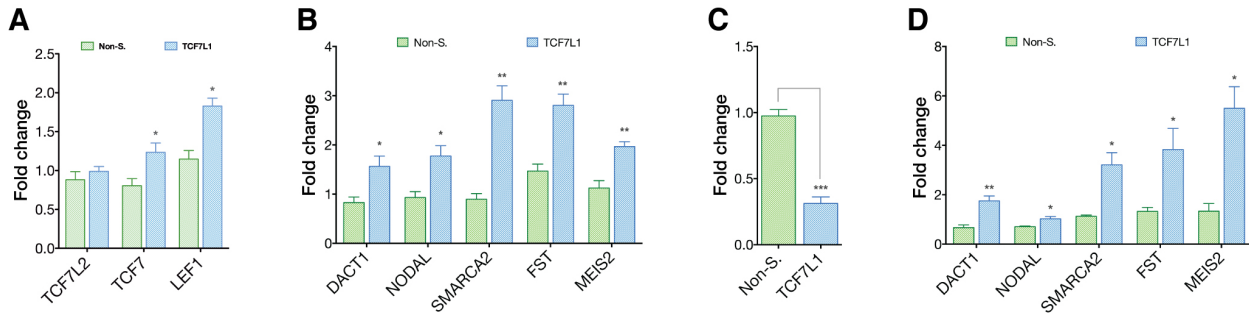

### Supplemental Figure 6. Analysis of TCF7L1 knockdown in H9 hESCs.

- A. qPCR analysis of LEF/TCF mRNAs 3 days post-siRNA KD of TCF7L1 show minimal up-regulation of *LEF1* (Avg. Ct = 34.1) and *TCF7* (Avg. Ct = 29.7) (n=3 two-tailed *t*-test \* $P \leq 0.05$ ).
- B. Confirmation of *TCF7L1* siRNA KD up-regulation of target genes in hESC line H14 (n=3 two-tailed *t*-test \* $P \leq 0.05$ , \*\* $P \leq 0.01$ ).
- C. *TCF7L1* knockdown using a second siRNA (siRNA #2) after 3 days. Non-silencing (Non-S.) and *TCF7L1* siRNA were used at 50 nM (n=3 two-tailed *t*-test \*\*\* $P \leq 0.001$ ).
- D. Confirmation of *TCF7L1*-regulated genes identified in the microarray study using siRNA #2 by qPCR (n=3 two-tailed *t*-test \* $P \leq 0.05$ , \*\* $P \leq 0.01$ ).



### **Supplemental Figure 7. Characterization of TCF7L1 H9 Over-Expression Cell Line.**

- A. FLAG-TCF7L1-HTBH is localized to the nucleus in H9-TCF7L1 line. Immunofluorescence analysis of OCT4 (red) and FLAG (green) in H9-TCF7L1 under feeder-free conditions with or without 24 hrs of doxycycline induction (1  $\mu\text{g/ml}$ ). Nuclei were stained with Hoechst.
- B. The H9-GFP inducible cell line robustly and uniformly expresses GFP in the presence of doxycycline. Live cells were imaged for GFP expression after 24 hours of doxycycline (1  $\mu\text{g/ml}$ ) induction.
- C. FLAG-TCF7L1-HTBH (F-TCF7L1-H) over-expression is robustly controlled by doxycycline. H9-TCF7L1 cell line was induced for 3 hrs with the indicated concentrations of doxycycline and then whole cell extracts were harvested for Western blot analysis. The higher molecular weight band is FLAG-TCF7L1-HTBH and the second, slightly lower, band is endogenous TCF7L1 that serves as a loading control. The data show rapid responses to doxycycline and no observable leaky expression in the absence of doxycycline.

**A**

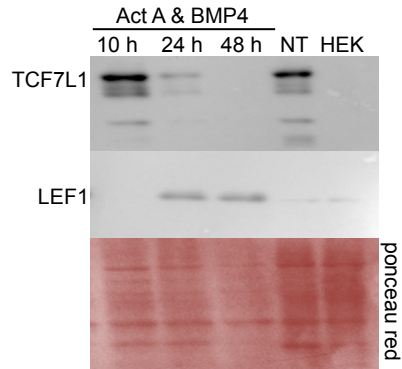

**B**

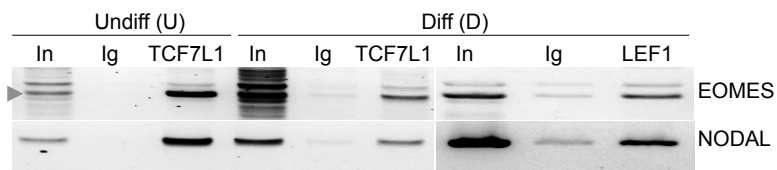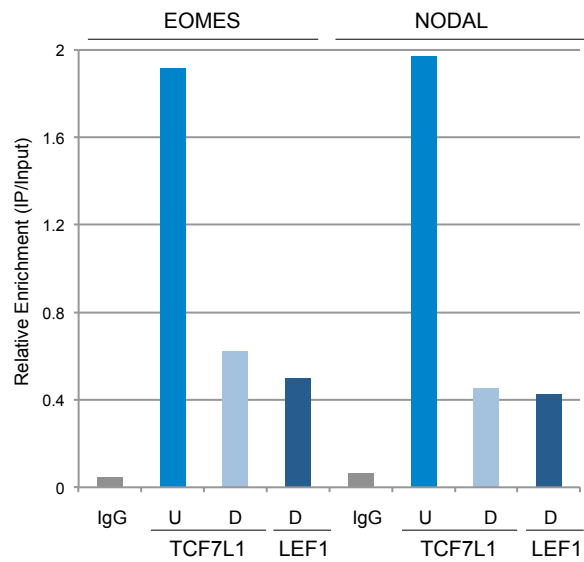

**Supplemental Figure 8. Analyses of TCF7L1 and LEF1 protein expression and chromatin binding following mesoderm induction.**

- A. Western blot analyses of TCF7L1 and LEF1 protein levels in H9 hESCs following differentiation into mesendoderm. Twenty microgram of total protein was loaded per lane. NT2D and HEK293 were used as positive and negative controls respectively. Ponceau red staining was used to verify equal loading and transfer of protein across samples. Note that TCF7L1 protein levels decline following induction of differentiation while levels of LEF1 protein increase.
- B. Analyses of TCF7L1 and LEF1 binding at the EOMES and NODAL loci in undifferentiated (U) and differentiated (D) H9 hESCs. PCR analyses with primers that amplified regions near the promoters of EOMES and NODAL. Bar graphs show the average quantification of the band intensities from two replicates. Percentage of enrichment (IP/input) was measured using ImageJ.

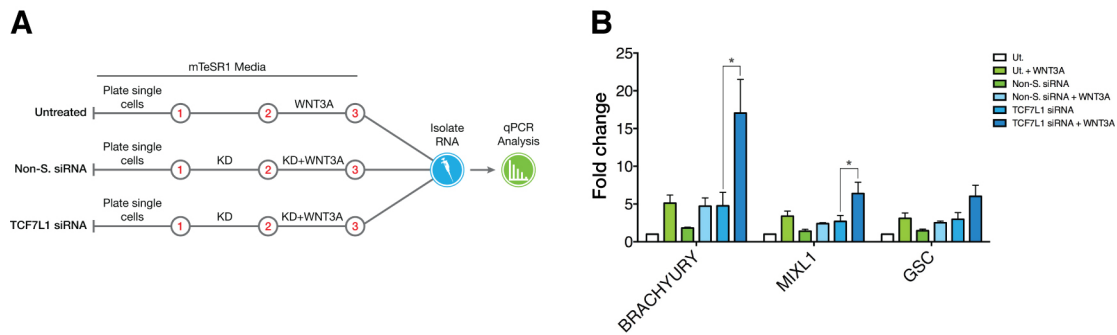

### Supplemental Figure 9. Loss of TCF7L1 Sensitizes hESCs to WNT3A-induced Gene Expression.

- A. Schematic of experiment. hESCs were treated with WNT3A (10 ng/ml) while performing *TCF7L1* siRNA (50 nM) knockdown under feeder-free conditions. Cells were harvested after 48 hrs of siRNA knockdown and 24 hrs of WNT3A treatment. Although absent from schematic, we performed control experiments without WNT3A treatment for each condition. Red numbers indicate days of procedure.
- B. qPCR analysis showing increased up-regulation of PS markers when WNT3A treatment is combined with *TCF7L1* knockdown (n=4 one-tailed *t*-test \* $P \leq 0.05$ ).

Table S1. qPCR Probes and Primers.

| Taqman Assays |               | SYBR Green Assays |                               |                               |
|---------------|---------------|-------------------|-------------------------------|-------------------------------|
| GENE SYMBOL   | Cat#          |                   | Fwd. Primer                   | Rev. Primer                   |
| TCF7L1        | Hs01064111_m1 | AXIN2             | CTGGGGGCAGCGAGTATTAC          | GCCTTTCCCATTGCGTTTGG          |
| TCF7L2        | Hs01009038_m1 | WNT3              | AGGGCACCTCCACCATTTG           | GACACTAACACGCCGAAGTCA         |
| TCF7          | Hs01556515_m1 | NODAL             | TACAGGCAGAAGATGTGGCAGTGGAT    | ATCCTCTTGTTGGCTCAGGAAGGA      |
| LEF1          | Hs01547250_m1 | GAPDH             | GTGGACCTGACCTGCCGTCT          | GGAGGAGTGGGTGTCGCTGT          |
| POU5F1        | Hs00999632_g1 | DACT1             | TGGAGGAGAAGTTCTTGGAGGAGA      | TCCAGTCTCAGGTCATTATCTGC       |
| SOX2          | Hs01053049_s1 | BMP4              | ATGATTCTCGGTAACCGAATGC        | CCCCGTCTCAGGTATCAAACCT        |
| NANOG         | Hs02387400_g1 | DGKK              | ATTGATCTGTCTCAAGCCACTG        | TCTTCCATGTCTTTCCGGTTG         |
| BRACHYURY     | Hs00610080_m1 | TMEM130           | TCCATCATCGGGACCTTAC           | CCCGGTCTTCTGCTTCACAG          |
| MIXL1         | Hs00430824_g1 | RUNDC34           | CGGGGCTTTTGGGACTATATC         | GCAGAGCCGTGGTGATGTATT         |
| GSC           | Hs00418279_m1 | SYT4              | ATGGGATACCCTACACCCAAAT        | TCCCGAGAGAGGAATTAGAACCT       |
| SMARCA2       | Hs00268234_m1 | TCF7L1 (PCR)      | TCTCCCTCACCACCAAACAGAAA       | TGTCTTCTCACATGGTGATGGCCT      |
| FST           | Hs00246256_m1 | B-ACTIN PCR       | TGACGGGGTCACCCACACTGTGCCATCTA | CTAGAAGCATTGCGGTGGACGATGGAGGG |
| MEIS2         | Hs00542638_m1 |                   |                               |                               |
| 18S           | Hs99999901_s1 |                   |                               |                               |
| GAPDH         | Hs99999905_m1 |                   |                               |                               |

Table S2 Antibodies.

| <b>Antibody</b>         | <b>Company</b> | <b>Cat #</b> | <b>Species</b> | <b>Western Blot</b> | <b>ICC</b>      | <b>CHIP</b> |
|-------------------------|----------------|--------------|----------------|---------------------|-----------------|-------------|
| FLAG M2                 | Sigma          | F3165        | Mouse          | 1.2 ug/ml (1:2500)  | 8 ug/ml (1:375) |             |
| TCF7L1                  | Cell Signaling | 2883         | Rabbit mAb     | 1:1000              | 1:100           |             |
| OCT4                    | R&D            | AF1759       | Goat           | 1:1000              | 1:100           |             |
| ACTIN                   | Santa Cruz     | sc-1616      | Goat           | 1:1000              |                 |             |
| B-CATENIN               | Cell Signaling | 2677         | Mouse mAb      |                     | 1:200           |             |
| LEF1                    | Cell Signaling | 76010        | Rabbit mAb     | 1:1000              |                 | 1:50        |
| TCF7L1                  | Santa Cruz     | sc-166411    | Mouse mAb      |                     | 1:100           |             |
| TCF7L1                  | Santa Cruz     | sc-8635      | Goat pAb       |                     | 1:100           | 5.0 ug      |
| B-CATENIN (non-phospho) | Cell Signaling | 8814         | Rabbit mAb     |                     | 1:100           |             |
| NANOG                   | Santa Cruz     | sc293121     | Mouse mAb      |                     | 1:100           |             |
| SOX2                    | Santa Cruz     | sc365964     | Mouse mAb      |                     | 1:100           |             |
| TCF7L1                  | Active Motif   | 61125        | Rabbit pAb     |                     |                 | 10 uL       |
| Normal Rabbit IgG       | Millipore      | 12-370       | Rabbit IgG     |                     |                 | 2.5 ug      |



Table S3 Small Molecules and siRNAs.

| <b>Small Molecule</b> | <b>Vendor</b> | <b>Concentrations</b> |  |
|-----------------------|---------------|-----------------------|--|
| IWP-2                 | Stemgent      | 2 $\mu$ M             |  |
| CHIR-99021            | Selleckchem   | 3 $\mu$ M             |  |
| SB431542              | Tocris        | 10 $\mu$ M            |  |
| SU5402                | EMD Millipore | 10 $\mu$ M            |  |

  

| <b>siRNA</b>  | <b>Company</b> | <b>Cat. No.</b> | <b>Conc.</b> |
|---------------|----------------|-----------------|--------------|
| TCF7L1 #1     | Dharmacon      | J-014703-05     | 50 nM        |
| TCF7L1 #2     | Dharmacon      | J-014703-06     | 50 nM        |
| Non-targeting | Dharmacon      | D-001810-02-05  | 50 nM        |

Table S4 ChIP-qPCR Primers.

|                     | <b>Fwd. Primer (5' &gt; 3')</b> | <b>Rev. Primer (5' &gt; 3")</b> | <b>Coordinants</b>       |
|---------------------|---------------------------------|---------------------------------|--------------------------|
| <b>NODAL</b>        | CCCAGTGATTCAGGAGGAAAG           | GCCCAGAGATCAAAGTGAGTG           | chr10:72202124+72202246  |
| <b>WNT3</b>         | GTGAATGTGTGGACCTTAGAC           | GTGGAGCCTCACTGAATACAC           | chr17:44899079+44899218  |
| <b>TDGF1</b>        | ACGTCCGCCTGGAATTTG              | GACTAGGAAGCTTGAAACTGAGATAG      | chr3:46618663+46618753   |
| <b>BMP4</b>         | GCCTGTGACCAGCTTCTT              | CCTATGGTGAGCAAGGCTAC            | chr14:54423188+54423273  |
| <b>EOMES</b>        | GGAGTCAGTCAGAACCAAAGAG          | CGGGAGGGCACTTGATTT              | chr3:27769942+27770027   |
| <b>GSC</b>          | GTTGTCGATGCTGAACATGC            | CGCTCTCTTTCGGTTTGGT             | chr14:95236323+95236461  |
| <b>OTX2</b>         | TGCAAAGTCGGCCCAAAT              | CCTTAGTTCCACTGCTCCAAAC          | chr14:57272193+57272299  |
| <b>MIXL1</b>        | CAGGCTGTAAAGCTGCAAATC           | AGCAACTGTCTGGTTCACTATC          | chr1:226398694+226398828 |
| <b>FOXD3</b>        | GTGCGCTGCTCTTACTCTTTA           | CGAGGTTCCCATATCGTGTTT           | chr1:63787728+63787822   |
| <b>BMPR2</b>        | GCACTACACAAATCCTTGAAAC          | GAGTTAGAGTTGTGTCGGGATAG         | chr2:203240062+203240160 |
| <b>Neg. Control</b> | CCGAATTTGGGCCTCTACAA            | CATGGTGGCTACGGTGAATAA           |                          |
